# Supplementary material for: Nanoporous copper oxide ribbon assembly of free-standing nanoneedles as biosensors for glucose
Source: Royal Society of Chemistry journal article supplement (doi:10.1039/c5an00609k), 2015-01-01
Supplement: c5an00609k1.pdf [file c5an00609k1.pdf]

Electronic Supplementary Information

## Nanoporous Copper Oxide Ribbons Assembly of Free-Standing Nanoneedles as Biosensors for Glucose

Shaodong Sun, Yuexia Sun, Anran Chen, Xiaozhe Zhang and Zhimao Yang\*

*School of Science, State Key Laboratory for Mechanical Behavior of Materials, MOE Key Laboratory for Non-Equilibrium Synthesis and Modulation of Condensed Matter, Collaborative Innovation Center of Suzhou Nano Science and Technology, Xi'an Jiaotong University, Xi'an 710049, ShaanXi, People's Republic of China.*

**E-mail:** [zmyang@mail.xjtu.edu.cn](mailto:zmyang@mail.xjtu.edu.cn) (Z. M. Yang) .

**Table S1** Sample denotations and their corresponding detailed experimental conditions

| Sample | Molar CuSO <sub>4</sub> | of Volume between water and ethanol | ratio | Concentration of NaOH | Reaction temperature | Reaction time |
|--------|-------------------------|-------------------------------------|-------|-----------------------|----------------------|---------------|
| A      | 0.12 mmol               | 1:6                                 |       | 2 mol/L               | 80 °C                | 10 min        |
| B      | 0.12 mmol               | 1:3                                 |       | 2 mol/L               | 80 °C                | 10 min        |
| C      | 0.12 mmol               | 1:1                                 |       | 2 mol/L               | 80 °C                | 10 min        |
| D      | 0.12 mmol               | 2:1                                 |       | 2 mol/L               | 80 °C                | 10 min        |

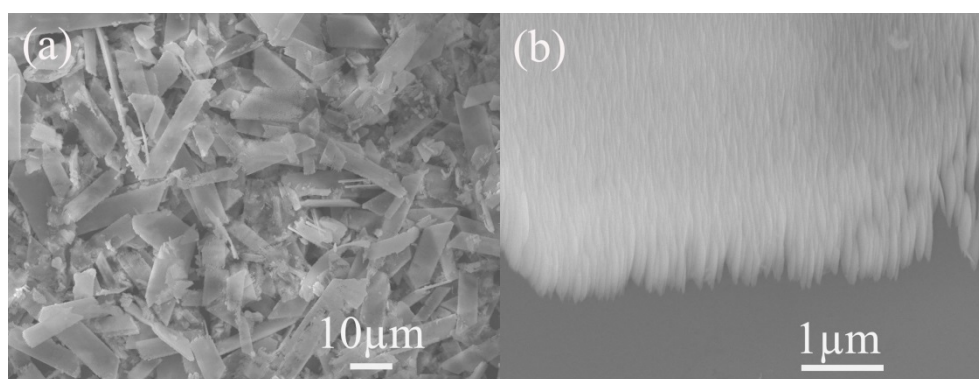

**Figure S1** FESEM images of the Cu<sub>3</sub>(OH)<sub>4</sub>(SO<sub>4</sub>) precursors. (a) Low-magnification; (b) High-magnification.

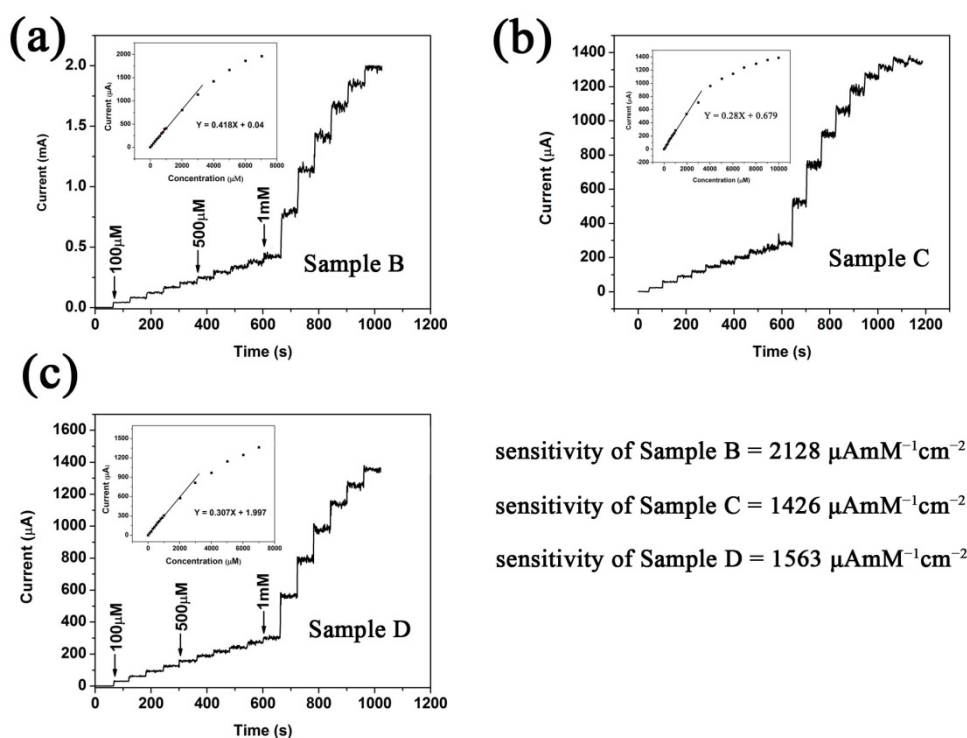

**Figure S2** (a) Amperometric response of the as-prepared Sample B (a), Sample C (b) and Sample D (c) with successive addition of glucose to the 0.1 M KOH solution at regular intervals. The applied potential was +0.55 V (vs. Ag/AgCl (sat'd KCl) reference), and the insets are the corresponding current–glucose concentration calibration curve.

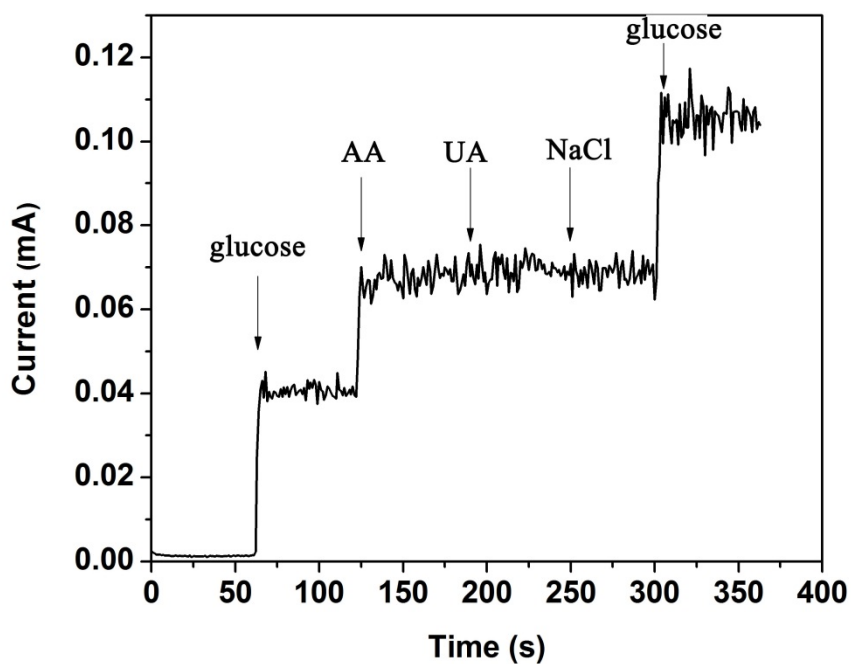

**Figure S3** Anti-interference property of CuO/NFs/GCE to the stepwise addition of 1 mM AA, 1 mM UA, and 1 mM NaCl, followed by the successive addition of 1 mM glucose solutions.

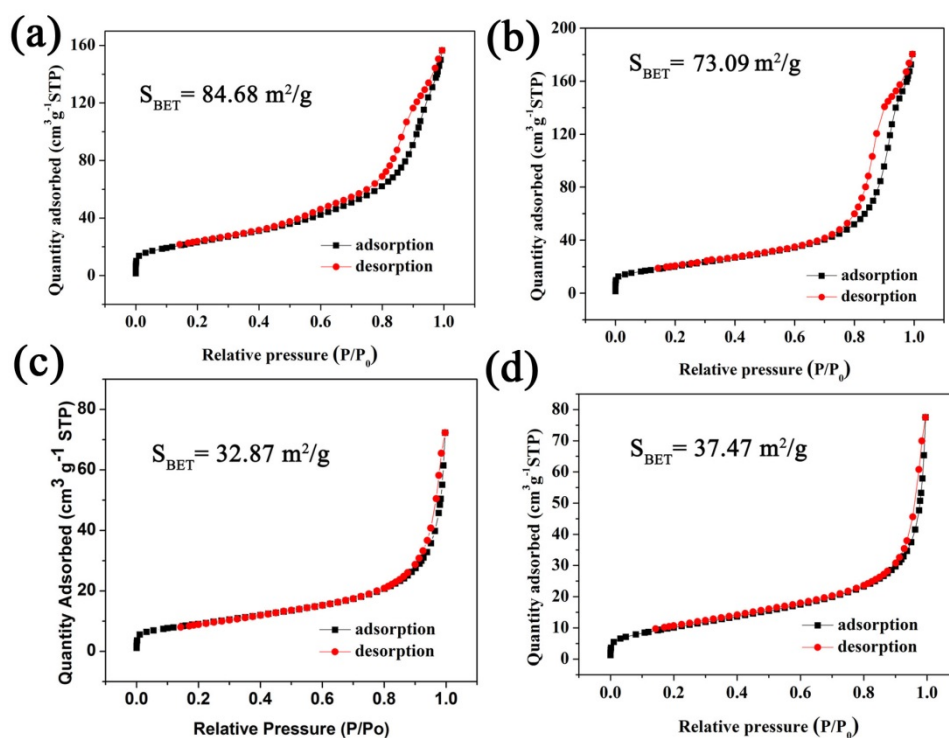

**Figure S4** Nitrogen adsorption–desorption isotherms of the as-prepared CuO nanostructures. (a) Sample A; (b) Sample B; (c) Sample C; (d) Sample D.

**Table S2.** Comparison of the key performance characteristics of some of existing catalysts for enzyme-free electrooxidation of glucose.

| Type of electrodes                                    | Potential (V) | Sensitivity ( $\mu\text{A mM}^{-1}\text{cm}^{-2}$ ) | Linear range (up to, mM) | LOD ( $\mu\text{M}$ ) | Ref                 |
|-------------------------------------------------------|---------------|-----------------------------------------------------|--------------------------|-----------------------|---------------------|
| CuO/MWCNTs                                            | 0.7           | 2109                                                | 3                        | 0.8                   | 1                   |
| CuO nanoparticles                                     | 0.55          | 1397                                                | 2.3                      | 0.5                   | 2                   |
| CuO nanoleaf/MCNTs                                    | 0.35          | 664.3                                               | 0.9                      | 5.7                   | 3                   |
| CuO nanorods/graphite                                 | 0.6           | 371.4                                               | 8                        | 4.0                   | 4                   |
| CuO nanospheres                                       | 0.6           | 404.5                                               | 2.6                      | 1.0                   | 5                   |
| CuO fibers                                            | 0.4           | 431                                                 | 2.5                      | 0.8                   | 6                   |
| CuO nanobelts                                         | 0.6           | 582                                                 | -                        | < 1.0                 | 7                   |
| <b>Hierarchical nanoneedle-aggregated CuO ribbons</b> | <b>0.55</b>   | <b>2241</b>                                         | <b>4</b>                 | <b>0.05</b>           | <b>Current work</b> |

[1] J. Yang, L. C. Jiang, W. D. Zhang, and S. Gunasekarana, *Talanta*, 2010, **82**, 25.

[2] S. Liu, J. Q. Tian, L. Wang, X. Y. Qin, Y. W. Zhang, Y. L. Luo, A. M. Asiri, A. O. Al-Youbi, and X. P. Sun, *Catal. Sci. Technol.*, 2012, **2**, 813.

- [3] Z. Y. Yang, J. S. Feng, J. S. Qiao, Y. M. Yan, Q. Y. Yu, and K. N. Sun, *Anal. Methods*, 2012, **4**, 1924.
- [4] X. Wang, C. Hu, H. Liu, G. Du, X. He, and Y. Xi, *Sens. Actuators B*, 2009, **144**, 220.
- [5] E. Reitz, W.Z. Jia, M. Gentile, Y. Wang, and Y. Lei, *Electroanalysis*, 2008, **20**, 2482.
- [6] W. Wang, L. L. Zhang, S. F. Tong, X. Li, and W. B. Song, *Biosens. Bioelectron.*, 2009, **25**, 708.
- [7] T. Soejima, H. Yagyu, and N. Kimizuka, S. Ito, *RSC Adv.*, 2011, **1**, 187.
